# Supplementary material for: High p16INK4a, a marker of cellular senescence, is associated with renal injury, impairment and outcome in lupus nephritis
Source: HighWire-hosted journal article supplement (doi:10.1136/rmdopen-2021-001844), 2021-10-01

Supplementary Figure 3

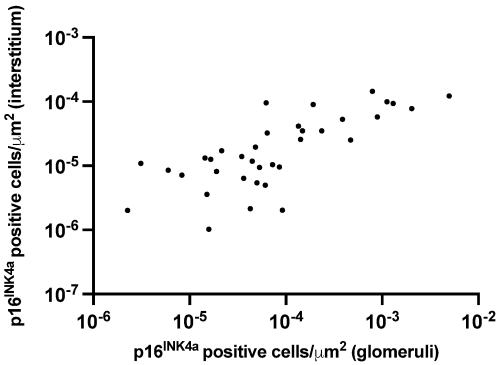

Supplementary Figure 4

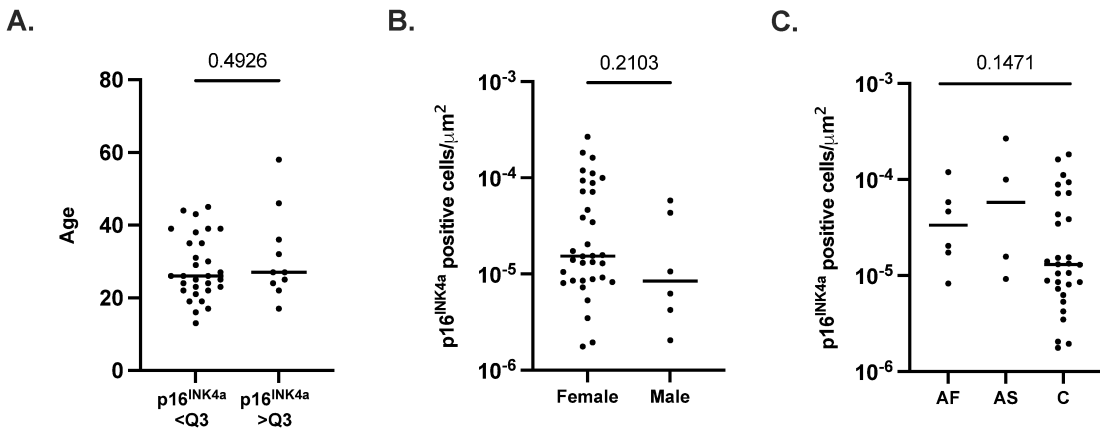

Supplementary Figure 5

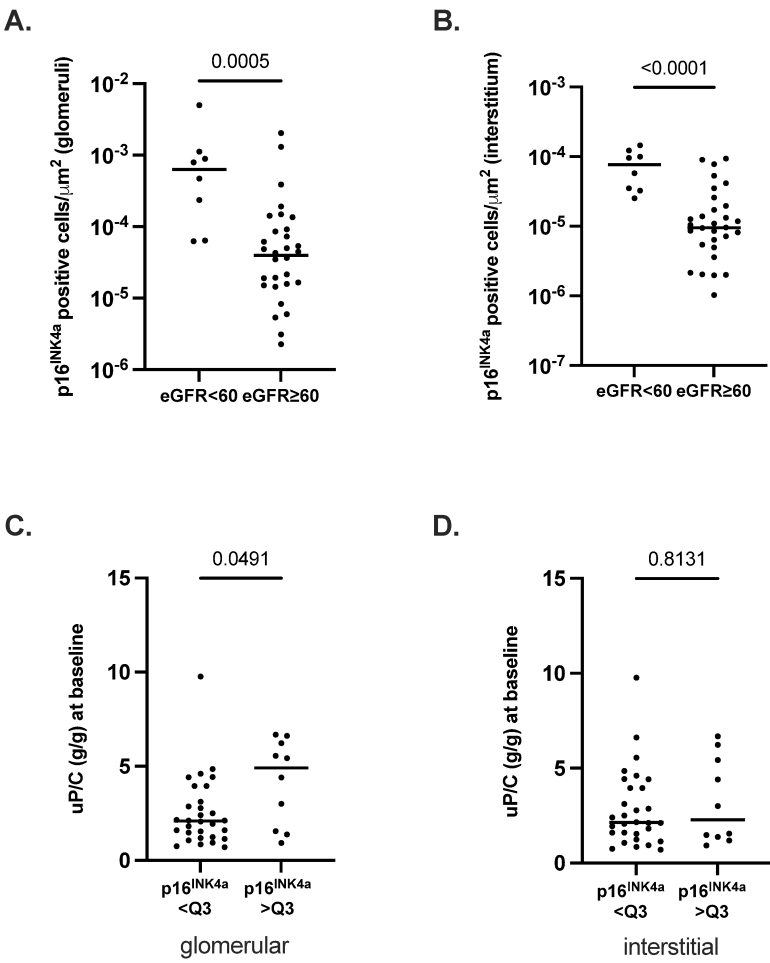

Supplementary Figure 6

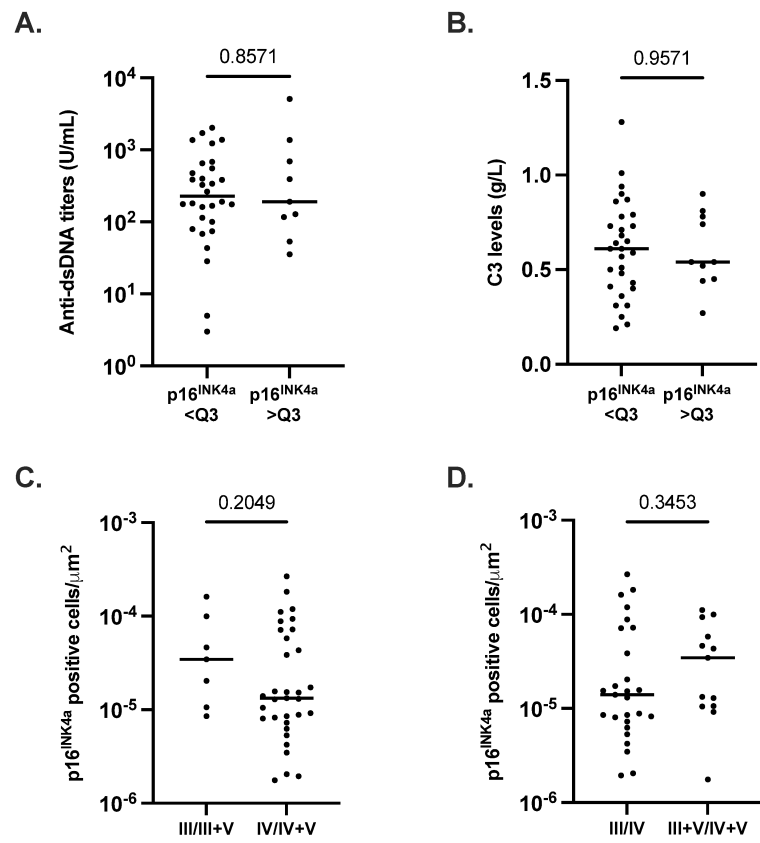

Supplementary Figure 7

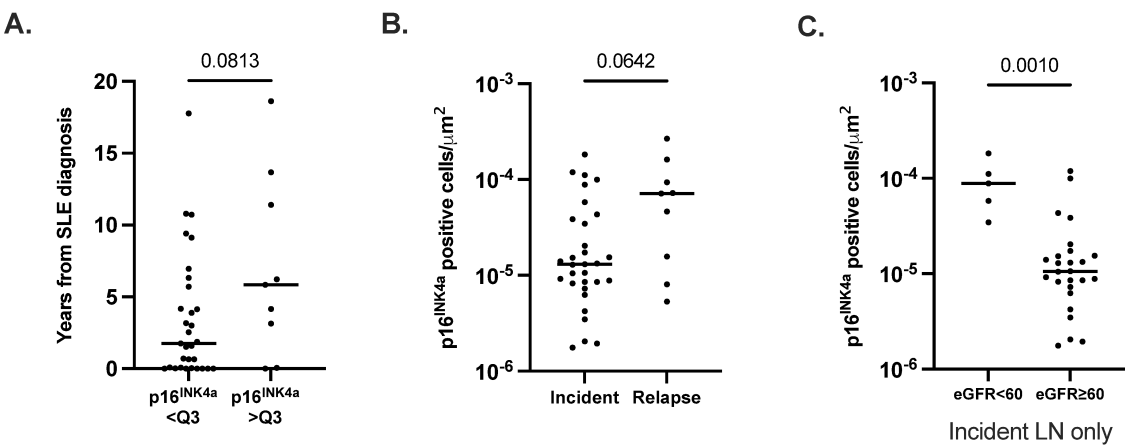

Supplement: rmdopen-2021-001844supp003_data_supplement.pdf [file rmdopen-2021-001844supp003_data_supplement.pdf]
