# Supplementary material for: High p16INK4a, a marker of cellular senescence, is associated with renal injury, impairment and outcome in lupus nephritis
Source: HighWire-hosted journal article supplement (doi:10.1136/rmdopen-2021-001844), 2021-10-01
Supplement: rmdopen-2021-001844supp004_data_supplement.pdf [file rmdopen-2021-001844supp004_data_supplement.pdf]

## Supplementary Methods

### Semi-quantitative histological scores

ISN/RPS classification (Weening JJ et al., *J Am Soc Nephrol.* 2004), NIH chronicity and activity index (CI, AI) (Bajema IM et al., *Kidney Int.* 2017) and sclerosis scores were retrieved from medical records. Sclerosis scores are semi-quantitative scores on PAS and trichrome-stained FFPE sections, on a scale of 0-6, obtained by adding glomerulosclerosis score (<30% of glomeruli affected: +1, 30-60%: +2, > 60%: +3) to interstitial fibrosis score (mild: +1, moderate: +2, extensive: +3).

Semi-quantitative PSR staining score (scale: 2-6) was obtained by adding the median glomerular fibrosis score (low: 1, intermediate: 2, high: 3) and the median interstitial fibrosis score (low: 1, intermediate: 2, high: 3), provided by three (blinded) scorers.

### Immunohistochemistry and PSR staining

Slides were incubated with mouse anti-human CD8 (mouse monoclonal antibody clone C8/144B, Dako; dilution 1/24) or anti-human p16<sup>INK4a</sup> (mouse monoclonal antibody clone E6H4, Roche Ventana CINtec Histology; prediluted ready-to-use), using the Benchmark ultra Ventana autostainer. Bound antibodies were labeled with ultraview universal horseradish peroxidase-labeled multimer (brown color, Roche Ventana). PSR staining was performed as previously described (Courtroy GE et al., *Biomolecules* 2020).

### Supplementary Figure Legends

**Supplementary Figure 1: Per-glomerulus quantification of p16<sup>INK4a</sup>, CD8 and fibrosis.** Representative images illustrating per-glomerulus analysis strategy on serial sections immuno-stained for p16<sup>INK4a</sup> and CD8, and PSR-stained for collagen deposits. **Top:** Detection of p16<sup>INK4a</sup>-positive cells (green, right panel) within glomerulus (delineated by maroon circle, left panel). **Middle:** Detection of CD8-positive cells within a 30µm radius (yellow from 0-10µm, orange from 10-20µm, red from 20-30µm, right panel) around glomerulus (delineated by maroon circle, left panel). **Bottom:** Detection of fibrous tissue (blue, right panel) surrounding the Bowman's capsule, normalized to the area of the glomerulus (delineated by purple circle), on PSR-stained section. Per-glomerulus p16<sup>INK4a</sup>: number of positive cells/µm<sup>2</sup> within glomerulus, CD8: number of positive cells within 30µm radius around glomerulus, Bowman's capsule thickness: area of fibrous tissue surrounding capsule, normalized to area of glomerulus section.

**Supplementary Figure 2: Representative images of p16<sup>INK4a</sup>, CD8 and PSR staining of kidney biopsies from patients with active LN. A-D.** p16<sup>INK4a</sup>, CD8 and PSR staining of FFPE serial sections from four different LN kidney biopsies harvested at baseline. Overview (left panels), close-up (right) showing p16<sup>INK4a</sup>-positive cells within a glomerulus, periglomerular CD8-positive cells, and collagen deposits in and around Bowman's capsule of the same glomerulus. Examples of low-to-moderate p16<sup>INK4a</sup>-stained samples (<75<sup>th</sup> percentile, "Q3") (**A-C**), and a high p16<sup>INK4a</sup> sample (>Q3) (**D**).

**Supplementary Figure 3: Correlation between glomerular and interstitial p16<sup>INK4a</sup> staining in LN baseline biopsies.** Significant positive correlation between p16<sup>INK4a</sup>

(positive cells/ $\mu\text{m}^2$ ) in glomerular and interstitial areas of biopsies. Spearman's rank-order correlation coefficient:  $r=0.7591$ ,  $p<0.0001$ .

**Supplementary Figure 4: p16<sup>INK4a</sup> accumulation is not associated with demographic parameters of LN patients.** **A.** Distribution of age of LN patients with p16<sup>INK4a</sup> low-to-moderate (<75<sup>th</sup> percentile, "Q3") vs. p16<sup>INK4a</sup>-high (>Q3) baseline kidney biopsies. **B.** p16<sup>INK4a</sup> values (positive cells/ $\mu\text{m}^2$ ) in biopsies from female vs. male LN patients. **C.** p16<sup>INK4a</sup> values (positive cells/ $\mu\text{m}^2$ ) in biopsies from patients of different ethnicities. Horizontal bars: medians. *p* values: Mann-Whitney (two groups) or Kruskal-Wallis test (three groups).

**Supplementary Figure 5: Association of severe proteinuria with higher glomerular but not interstitial p16<sup>INK4a</sup> in LN baseline biopsies.** **A, B.** Significantly higher p16<sup>INK4a</sup> (positive cells/ $\mu\text{m}^2$ ) in glomerular (**A**) and interstitial (**B**) areas of biopsies from patients with low eGFR (<60 mL/min/1.73m<sup>2</sup>). **C,D.** Significantly higher proteinuria (urinary protein/creatinine ratio, uP/C, g/g) associated with high (>75<sup>th</sup> percentile, "Q3") vs. low-to-moderate (<Q3) p16<sup>INK4a</sup> (positive cells/ $\mu\text{m}^2$ ) in glomerular areas (**C**) but not interstitial areas (**D**) of baseline kidney biopsies. Horizontal bars: medians. *p* values: Mann-Whitney test.

**Supplementary Figure 6: p16<sup>INK4a</sup> accumulation in LN baseline biopsies is not associated with parameters of systemic disease and ISN/RPS classification.** **A, B.** Similar baseline levels of serum anti double-stranded DNA (dsDNA) antibody (U/mL) (**A**)

or C3 (g/L) **(B)** in patients with p16<sup>INK4a</sup>-high (>75<sup>th</sup> percentile, “Q3”) vs. p16<sup>INK4a</sup> low-to-moderate (<Q3) baseline kidney biopsies. **C,D**. No significant differences in p16<sup>INK4a</sup> (positive cells/ $\mu\text{m}^2$ ) between ISN/RPS classifications (III (+V) vs. IV (+V), III/IV vs. III/IV+V). Horizontal bars: medians. *p values*: Mann-Whitney test.

**Supplementary Figure 7: p16<sup>INK4a</sup> accumulation is associated with lower eGFR in incident LN biopsies.** **A**. Longer (non-significant) duration between SLE and LN diagnosis (in years) in patients with p16<sup>INK4a</sup>-high (>75<sup>th</sup> percentile, “Q3”) vs. p16<sup>INK4a</sup> low-to-moderate (<Q3) baseline kidney biopsies. **B**. Higher (non-significant) p16<sup>INK4a</sup> (positive cells/ $\mu\text{m}^2$ ) in relapse vs. incident nephritis. **C**. Significantly higher p16<sup>INK4a</sup> (positive cells/ $\mu\text{m}^2$ ) is associated with low eGFR (<60 mL/min/1.73m<sup>2</sup>) in incident LN cases. Horizontal bars: medians. *p values*: Mann-Whitney test.
