# Supplementary material for: High p16INK4a, a marker of cellular senescence, is associated with renal injury, impairment and outcome in lupus nephritis
Source: HighWire-hosted journal article supplement (doi:10.1136/rmdopen-2021-001844), 2021-10-01
Supplement: rmdopen-2021-001844supp005_data_supplement.pdf [file rmdopen-2021-001844supp005_data_supplement.pdf]

**Supplementary Table 1: Demographic, clinical and biological patient data**

|                                                                          |                 |
|--------------------------------------------------------------------------|-----------------|
| <b>Number of patients (n)</b>                                            |                 |
| <b>Female/male</b>                                                       | 34/6            |
| <b>Incident/relapse</b>                                                  | 31/9            |
| <b>Age (years, median, IQR)</b>                                          | 25 (22-35)      |
| <b>Ethnicity (n)</b>                                                     |                 |
| <b>Caucasian</b>                                                         | 30              |
| <b>African</b>                                                           | 6               |
| <b>Asian</b>                                                             | 3               |
| <b>Other</b>                                                             | 1               |
| <b>Duration between SLE and nephritis diagnosis (years, median, IQR)</b> | 2.8 (0.07-6.2)  |
| <b>Serum dsDNA antibody titers (u/mL, median, IQR)</b>                   | 192 (107-606.4) |
| <b>Serum C3 (mg/dL, median, IQR)</b>                                     | 0.6 (0.4-0.8)   |
| <b>eGFR (mL/min/1.73m<sup>2</sup>, median, IQR)</b>                      |                 |
| <b>Baseline (n=40)</b>                                                   | 89 (66-111)     |
| <b>1-year follow-up (n=40)</b>                                           | 93 (74-105)     |
| <b>5-year follow-up (n=37)</b>                                           | 95 (72-109)     |
| <b>Proteinuria (urinary protein/creatinine ratio, g/g, median, IQR)</b>  | 2.1 (1.4-4.4)   |
| <b>ISN/RPS classification (number of biopsies)</b>                       |                 |
| <b>Class III (+V)</b>                                                    | 7               |
| <b>Class IV (+V)</b>                                                     | 33              |
| <b>Sclerosis score (median, IQR)</b>                                     | 1 (0-2)         |
| <b>NIH chronicity index (median, IQR)</b>                                | 2 (0.5-3)       |
| <b>NIH activity index (median, IQR)</b>                                  | 7 (4.5-9)       |
| <b>Treatment initiated after biopsy</b>                                  |                 |
| <b>Induction therapy</b>                                                 |                 |
| IV cyclophosphamide (n, 0.5-1g/monthly/8 pulses)                         | 2               |
| Euro-Lupus: IV cyclophosphamide (n, 500mg/biweekly/6 pulses)             | 26              |
| Mycophenolate mofetil (n, 2-3g/day)                                      | 12              |
| <b>Maintenance therapy</b>                                               |                 |
| Mycophenolate mofetil (n, 1-2g/day)                                      | 20              |
| Azathioprine (n, 2mg/kg/day)                                             | 20              |
