# Supplementary figures and images for: High p16INK4a, a marker of cellular senescence, is associated with renal injury, impairment and outcome in lupus nephritis
Source: HighWire-hosted journal article supplement (doi:10.1136/rmdopen-2021-001844), 2021-10-01

## Supplementary Figure 1

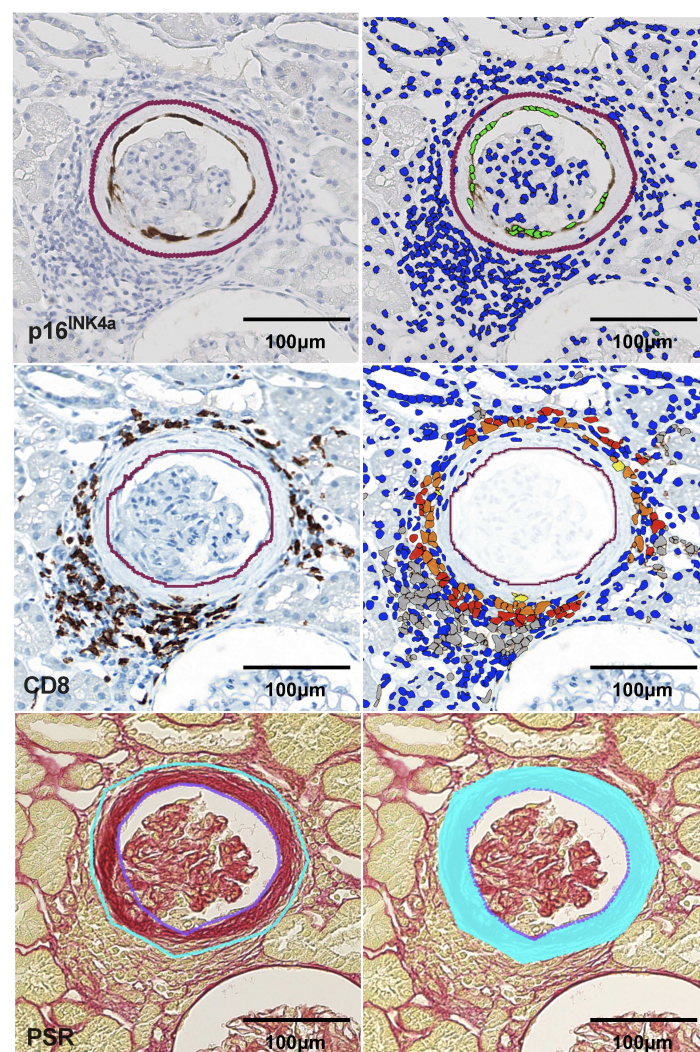

Supplement: rmdopen-2021-001844supp001_data_supplement.pdf [file rmdopen-2021-001844supp001_data_supplement.pdf]

Supplementary Figure 2

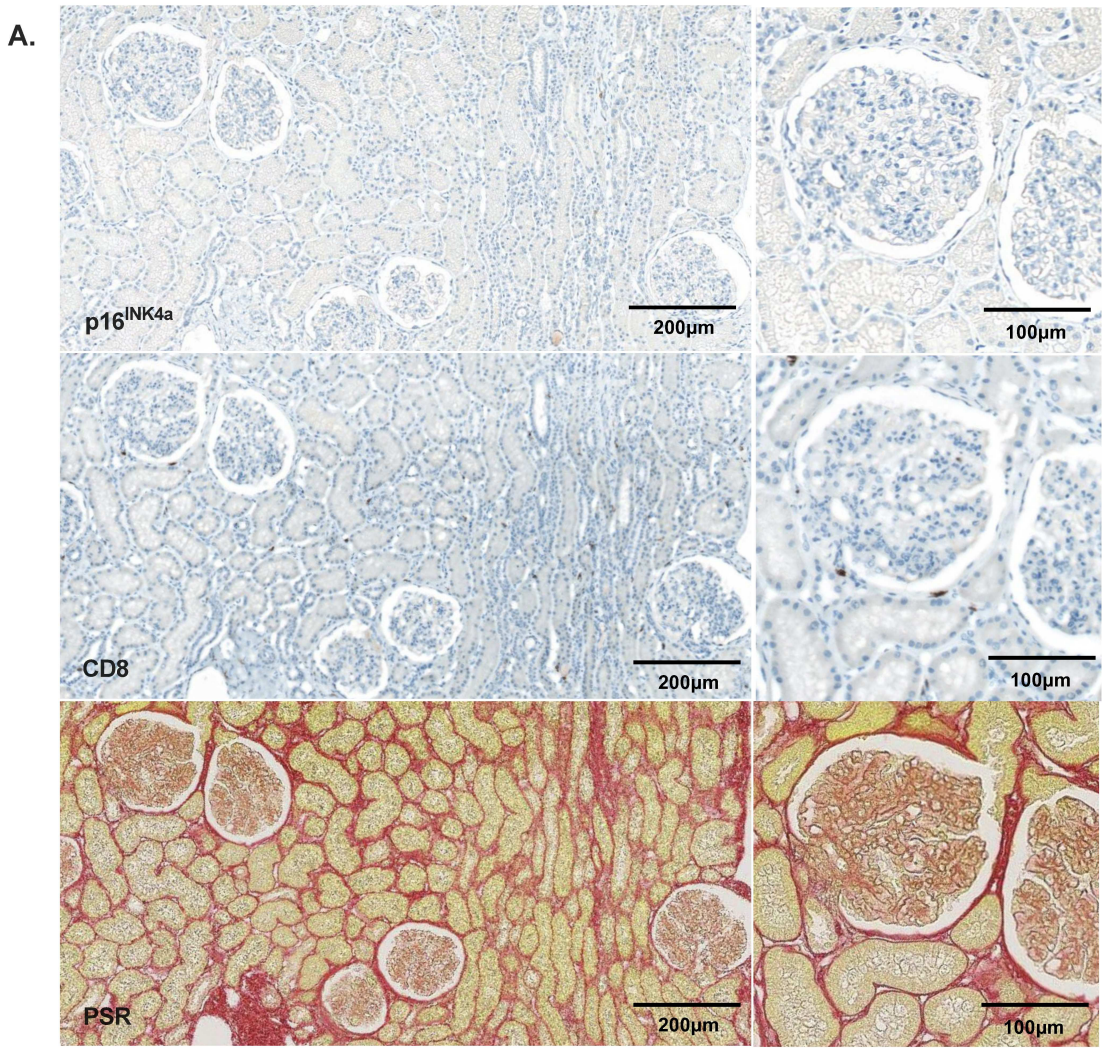



## Supplementary Figure 2

B.

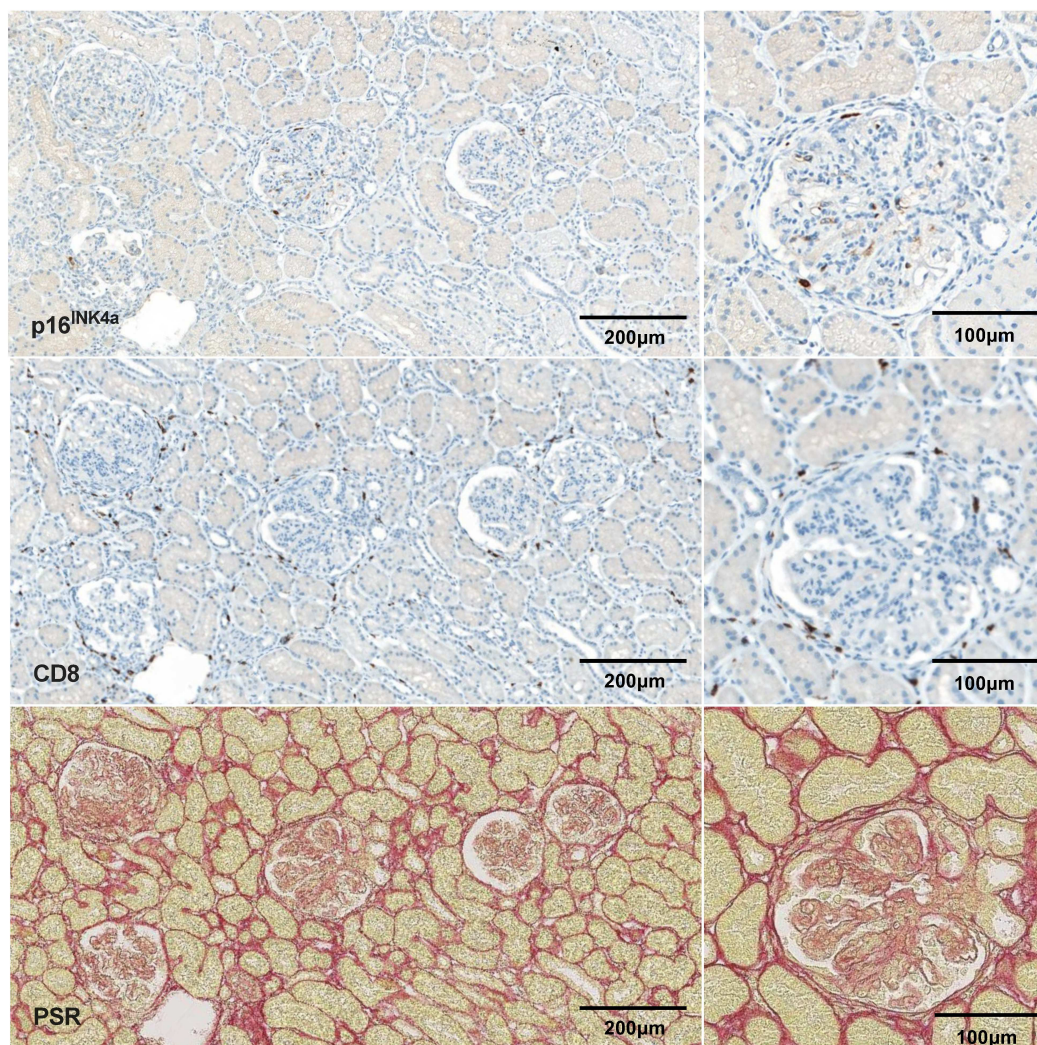



## Supplementary Figure 2

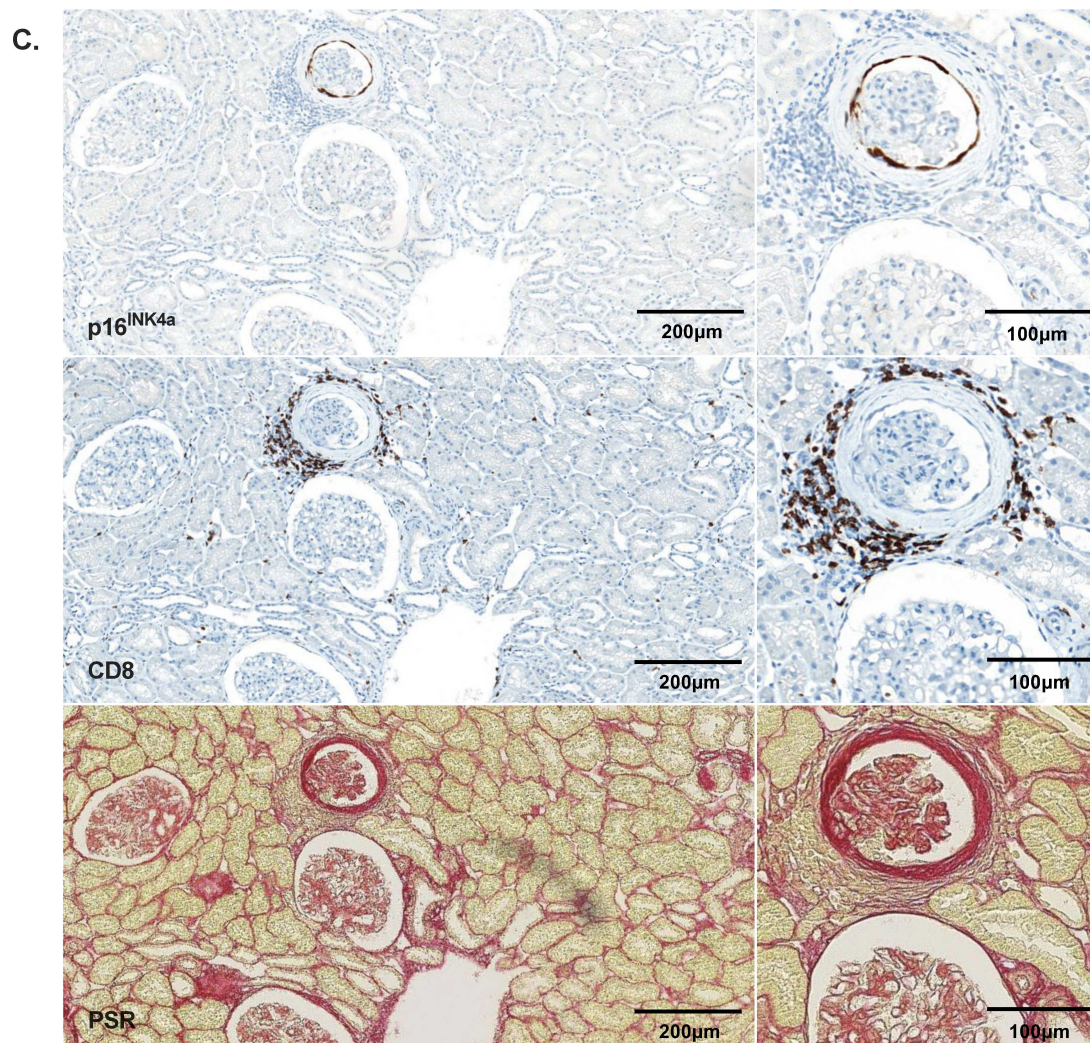



## Supplementary Figure 2

D.

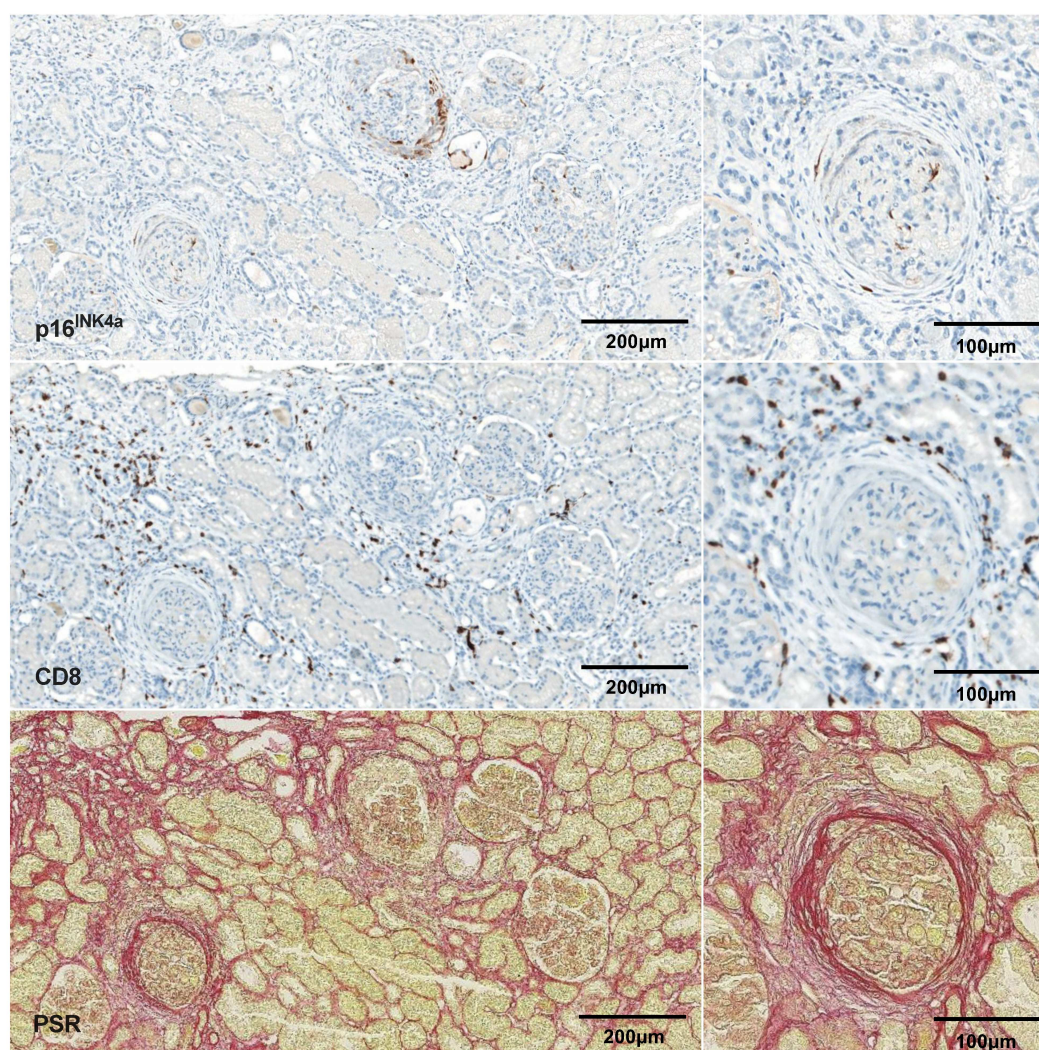

Supplement: rmdopen-2021-001844supp002_data_supplement.pdf [file rmdopen-2021-001844supp002_data_supplement.pdf]
